# Supplementary material
Source: Springer Nature journal article supplement (https://www.springermedizin.de/resource/supplementary/13256_2010_1377_MOESM4_ESM.pdf/9648850)

# Adrenalectomy

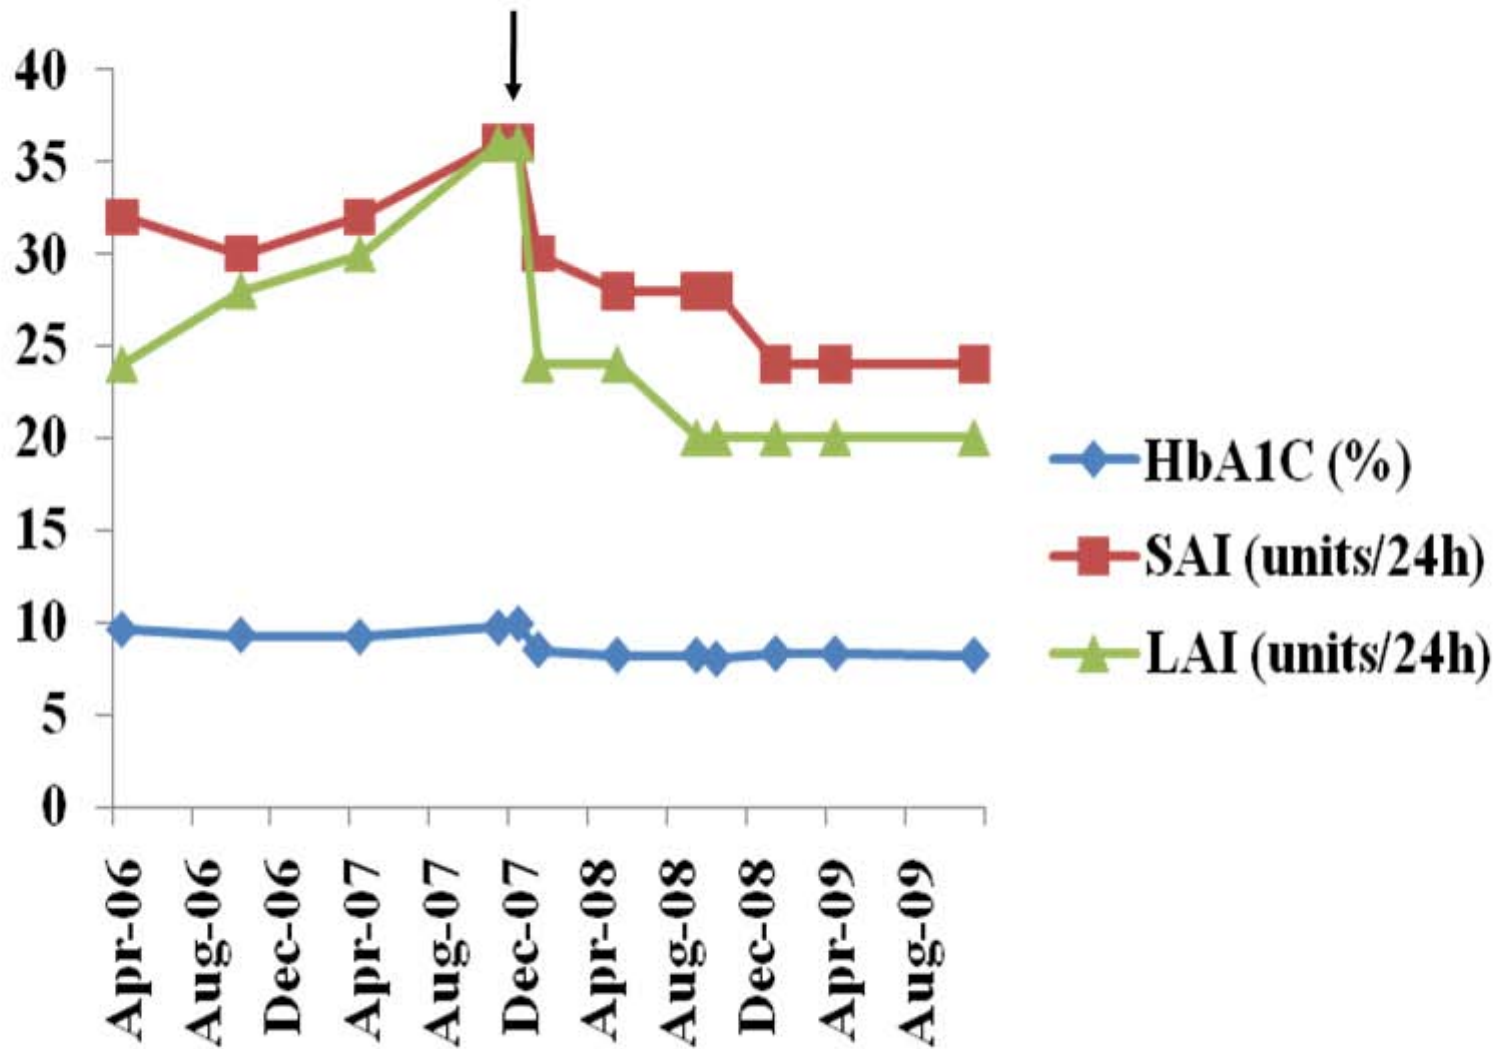

Supplement: MOESM4 [file 9648850]
